# Supplementary material
Source: publisher site journal article supplement (https://www.dovepress.com/article/557119)
Supplement: Supplementary file 1 [file 557119%20Supplementary%20Materials.docx]

**Supplementary Materials**

**Supplementary Figures**


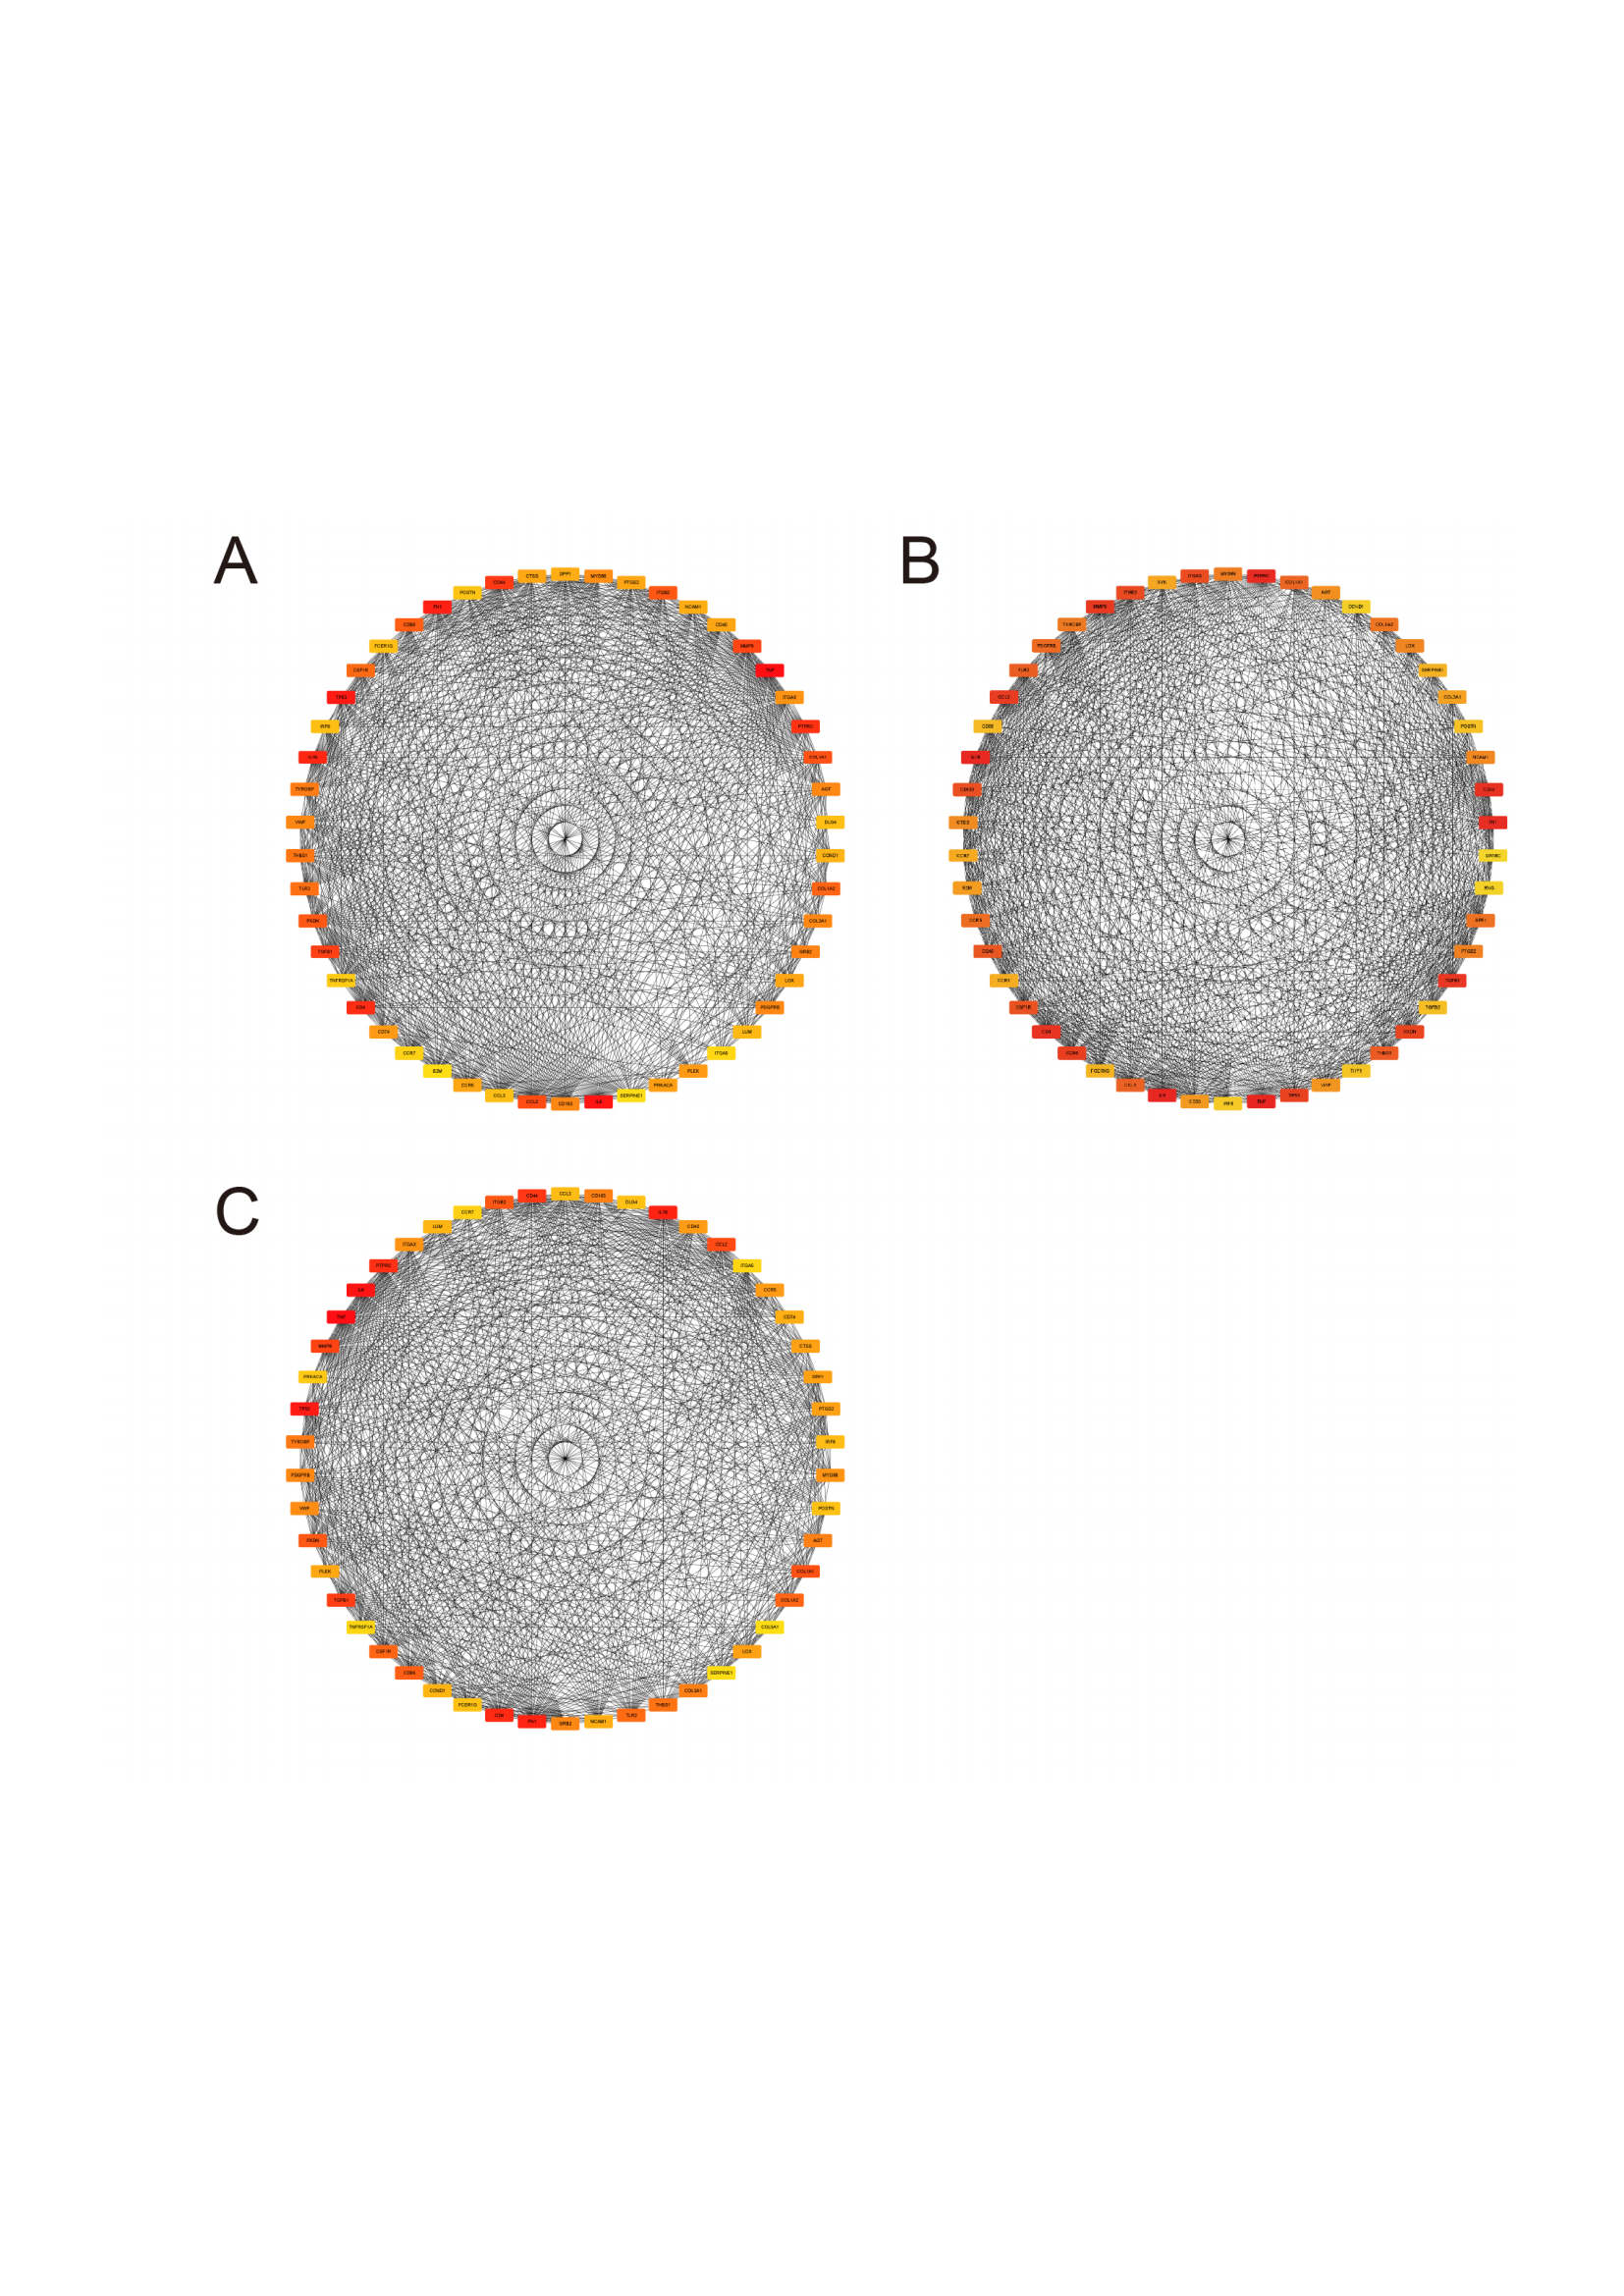


**Supplementary Figure S1** The PPI networks of the top 50 genes in the 1,283 PDE MeDEGs. (A) The PPI networks of the top 50 genes were constructed by MNC. (B) The PPI networks of the top 50 genes were constructed by Degree. (C) The PPI networks of the top 50 genes were constructed by EPC.


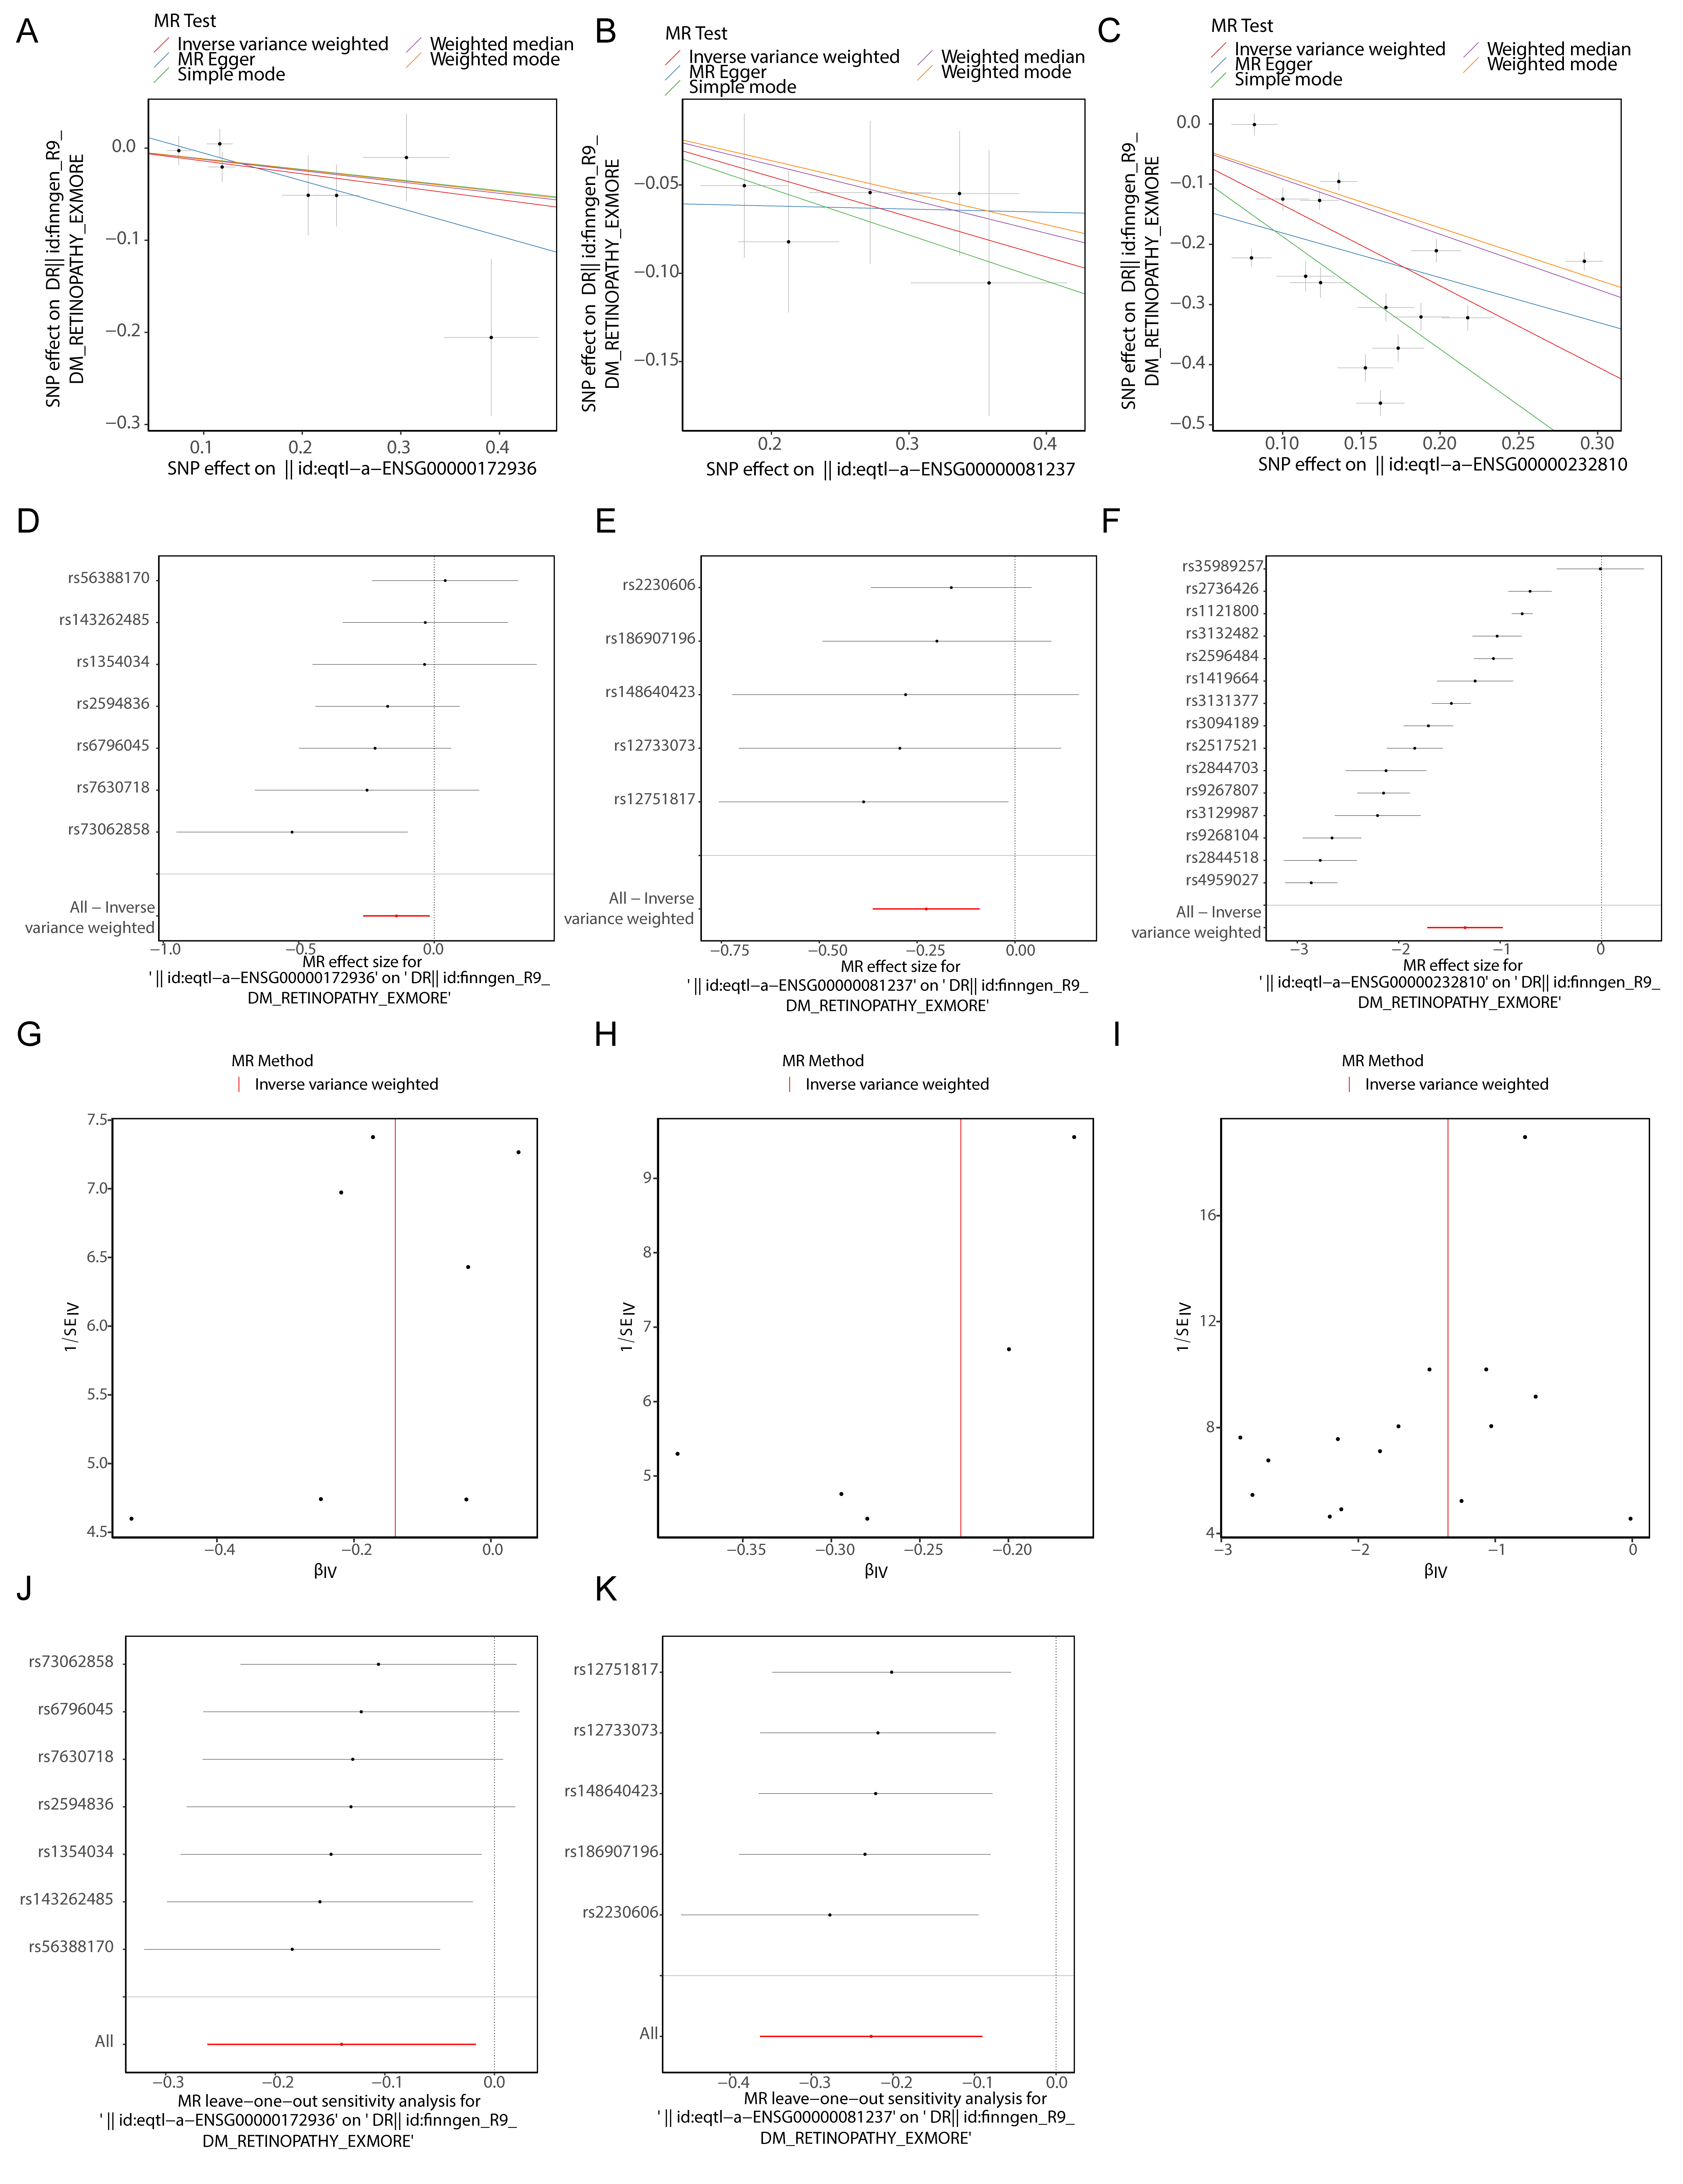


**Supplementary Figure S2** Visualization of the MR analysis of PTPRC, MYD88, and TNF on ischemic stroke. (A-C) Scatter plot showing the causal effect of PTPRC, MYD88, and TNF on the risk of DR. (D-F) Forest plot showing the causal effect of each SNP on the risk of DR. (G-I) Funnel plots to visualize heterogeneity of MR estimates for the effect of PTPRC, MYD88, and TNF on DR. (J, K) Forest plot showing the leave-one-out sensitivity analysis of the effect of PTPRC and MYD88 on DR.


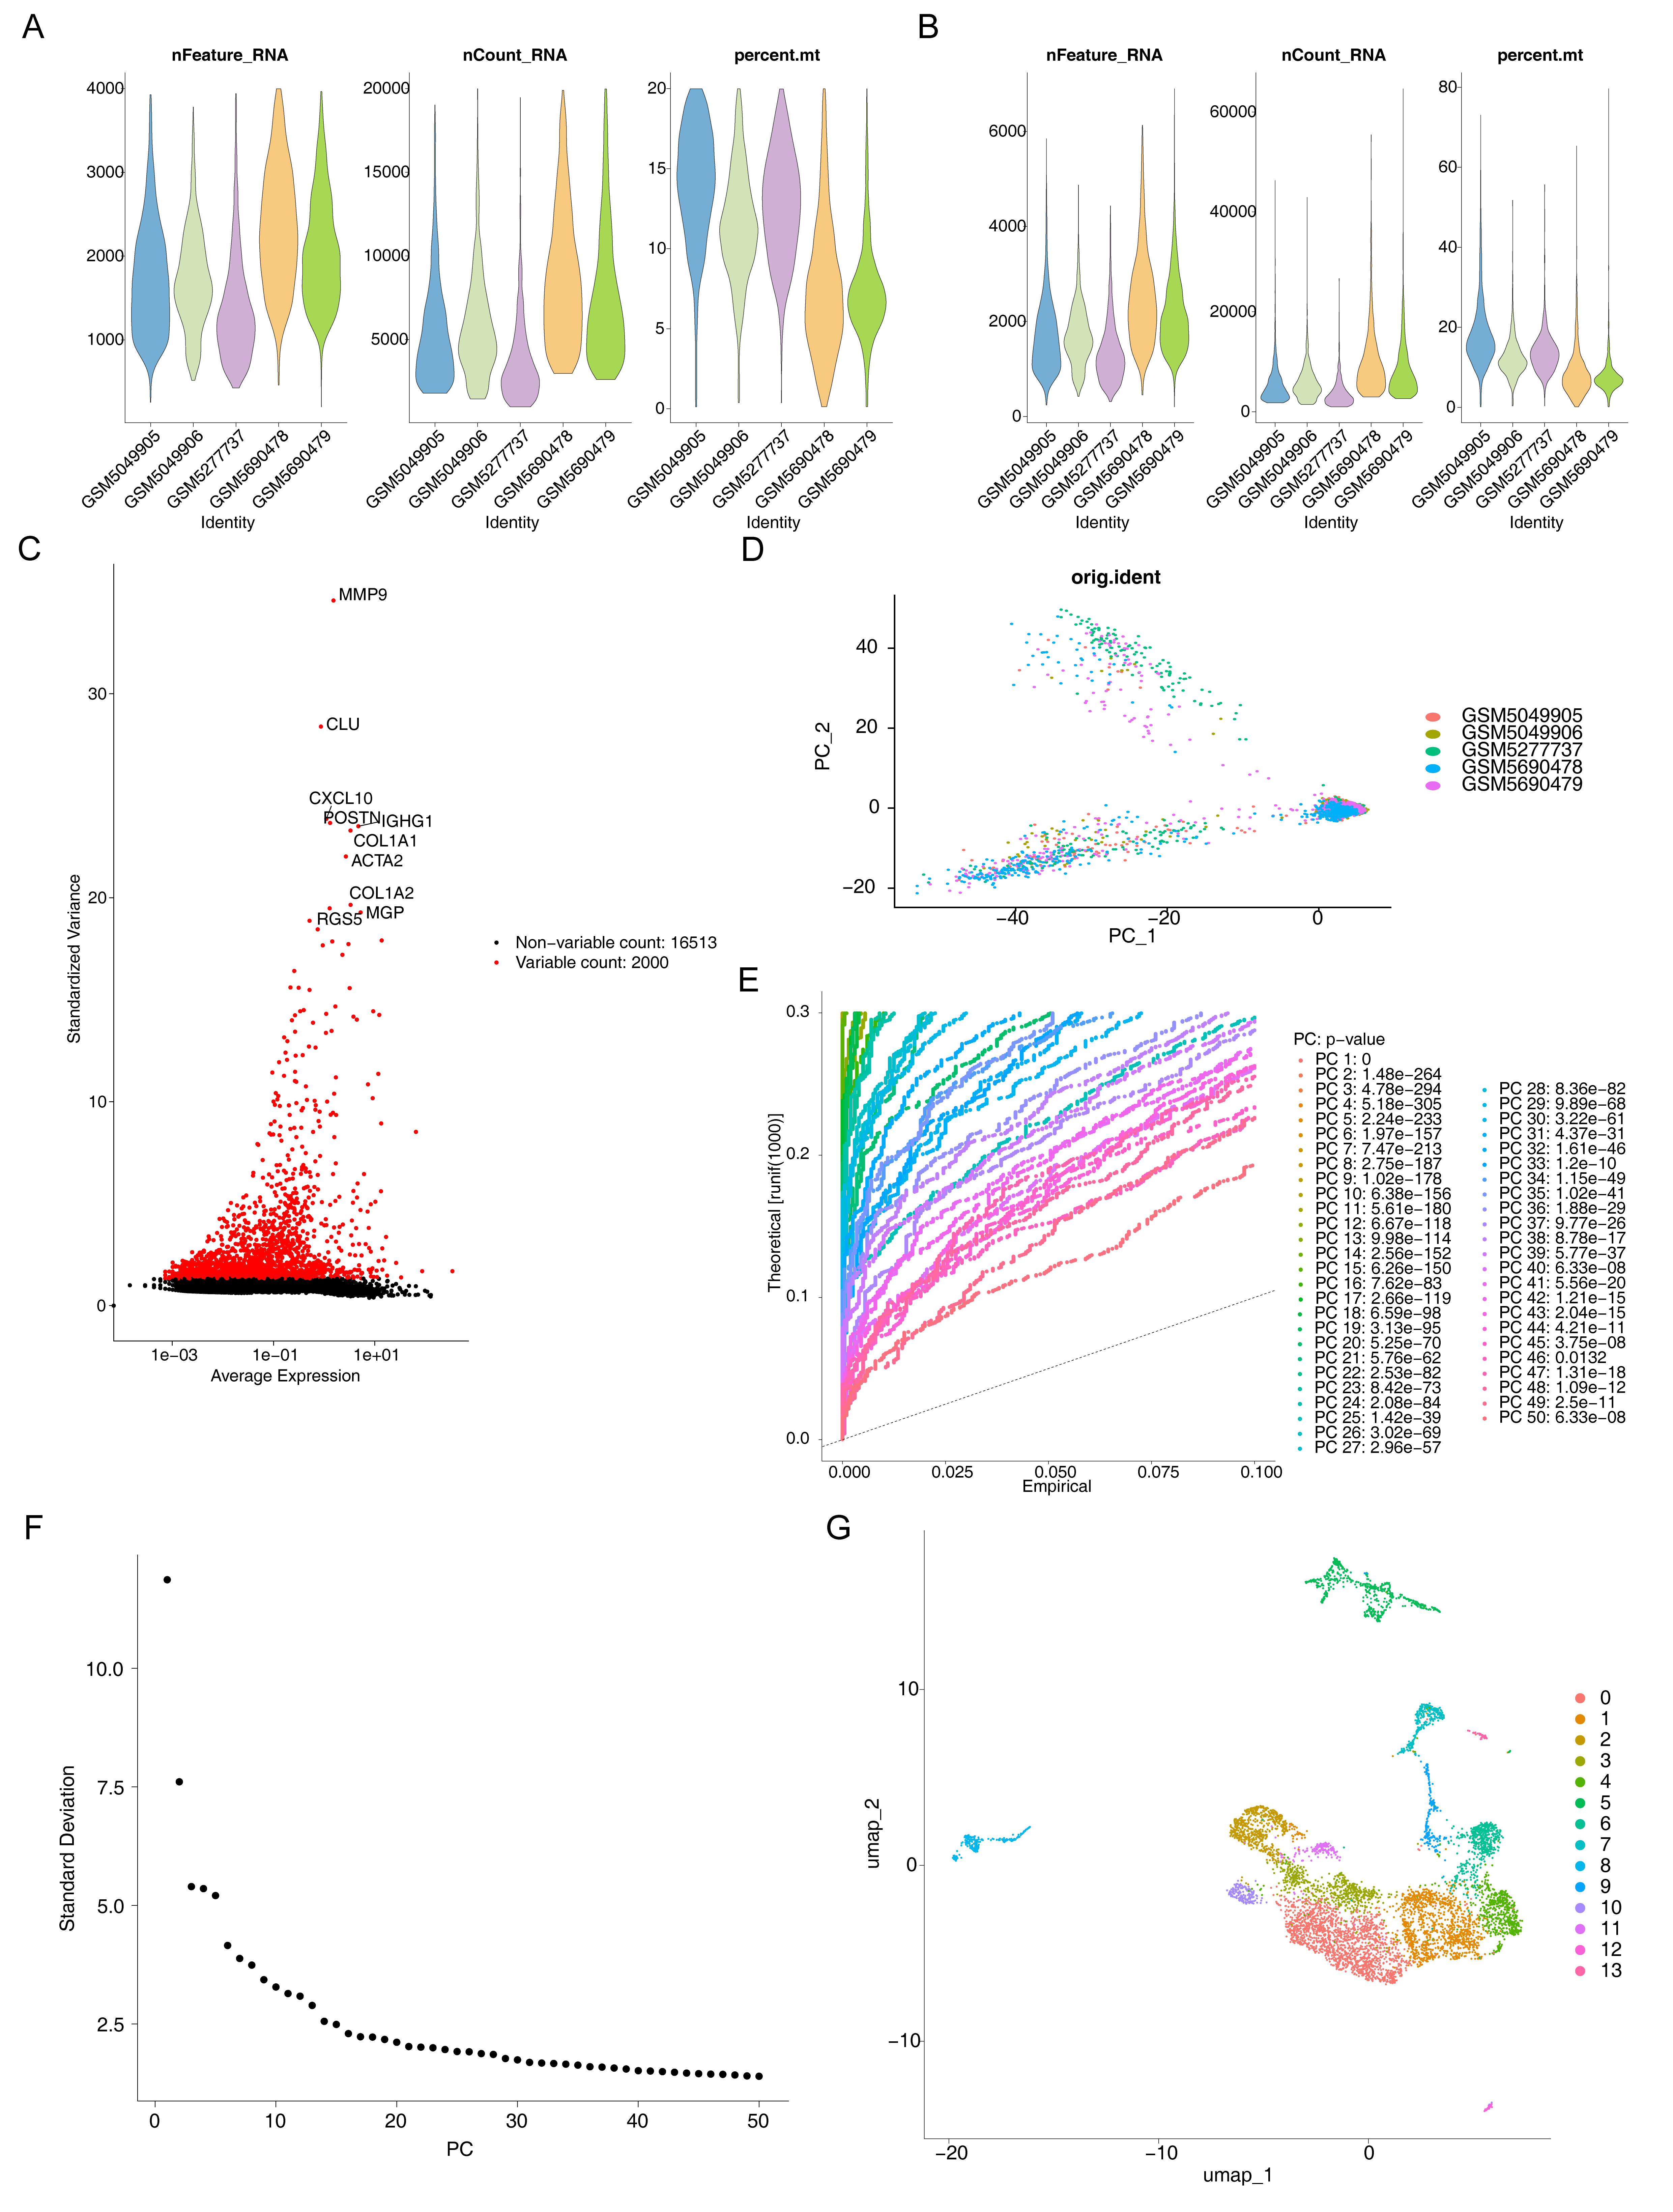


**Supplementary Figure S3** The pre-processing procedure of scRNA-seq analysis on GSE165784. (A, B) Comparison of single-cell data before and after quality control. (C) The top 2,000 highly variable genes were selected for subsequent analysis. (D) PCA indicated there was no significant batch effect between the different samples. (E, F) Statistically significant PCs were selected based on the JackStrawPlot function and the scree plot. (G) UMAP clustering of cells isolated from fibrovascular membranes.

**Supplementary Tables**

**Supplementary Table 1** Enrichment results of CD44

| Description | setSize | enrichmentScore | NES |
| --- | --- | --- | --- |
| KEGG_RIBOSOME | 84 | 0.79 | 3.64 |
| KEGG_LEISHMANIA_INFECTION | 68 | 0.77 | 3.44 |
| KEGG_LYSOSOME | 118 | 0.62 | 3.08 |
| KEGG_ANTIGEN_PROCESSING_AND_PRESENTATION | 69 | 0.66 | 2.96 |
| KEGG_SYSTEMIC_LUPUS_ERYTHEMATOSUS | 52 | 0.69 | 2.95 |
| KEGG_INTESTINAL_IMMUNE_NETWORK_FOR_IGA_PRODUCTION | 44 | 0.72 | 2.94 |
| KEGG_B_CELL_RECEPTOR_SIGNALING_PATHWAY | 73 | 0.65 | 2.94 |
| KEGG_GRAFT_VERSUS_HOST_DISEASE | 33 | 0.76 | 2.88 |
| KEGG_ALLOGRAFT_REJECTION | 33 | 0.76 | 2.88 |
| KEGG_TOLL_LIKE_RECEPTOR_SIGNALING_PATHWAY | 100 | 0.59 | 2.85 |
| KEGG_NATURAL_KILLER_CELL_MEDIATED_CYTOTOXICITY | 124 | 0.56 | 2.78 |
| KEGG_VIRAL_MYOCARDITIS | 65 | 0.63 | 2.77 |
| KEGG_PATHOGENIC_ESCHERICHIA_COLI_INFECTION | 55 | 0.64 | 2.75 |
| KEGG_APOPTOSIS | 84 | 0.59 | 2.75 |
| KEGG_T_CELL_RECEPTOR_SIGNALING_PATHWAY | 105 | 0.57 | 2.73 |
| KEGG_CHRONIC_MYELOID_LEUKEMIA | 73 | 0.59 | 2.66 |
| KEGG_LEUKOCYTE_TRANSENDOTHELIAL_MIGRATION | 113 | 0.54 | 2.64 |
| KEGG_FOCAL_ADHESION | 196 | 0.49 | 2.60 |
| KEGG_HEMATOPOIETIC_CELL_LINEAGE | 83 | 0.55 | 2.55 |
| KEGG_CYTOKINE_CYTOKINE_RECEPTOR_INTERACTION | 247 | 0.45 | 2.53 |
| KEGG_PATHWAYS_IN_CANCER | 319 | 0.44 | 2.51 |
| KEGG_CHEMOKINE_SIGNALING_PATHWAY | 180 | 0.46 | 2.43 |
| KEGG_REGULATION_OF_ACTIN_CYTOSKELETON | 209 | 0.44 | 2.39 |
| KEGG_NEUROTROPHIN_SIGNALING_PATHWAY | 123 | 0.48 | 2.39 |
| KEGG_P53_SIGNALING_PATHWAY | 66 | 0.60 | 2.68 |
| KEGG_JAK_STAT_SIGNALING_PATHWAY | 145 | 0.45 | 2.28 |
| KEGG_ASTHMA | 27 | 0.78 | 2.82 |
| KEGG_PROTEASOME | 41 | 0.68 | 2.74 |
| KEGG_FC_GAMMA_R_MEDIATED_PHAGOCYTOSIS | 91 | 0.52 | 2.43 |
| KEGG_PANCREATIC_CANCER | 69 | 0.56 | 2.51 |
| KEGG_SMALL_CELL_LUNG_CANCER | 83 | 0.51 | 2.35 |
| KEGG_NOD_LIKE_RECEPTOR_SIGNALING_PATHWAY | 61 | 0.58 | 2.58 |
| KEGG_AUTOIMMUNE_THYROID_DISEASE | 47 | 0.62 | 2.60 |
| KEGG_CELL_ADHESION_MOLECULES_CAMS | 126 | 0.45 | 2.24 |
| KEGG_COMPLEMENT_AND_COAGULATION_CASCADES | 67 | 0.53 | 2.35 |
| KEGG_AMINO_SUGAR_AND_NUCLEOTIDE_SUGAR_METABOLISM | 42 | 0.64 | 2.59 |
| KEGG_PROSTATE_CANCER | 89 | 0.48 | 2.23 |
| KEGG_RENAL_CELL_CARCINOMA | 65 | 0.54 | 2.37 |
| KEGG_ACUTE_MYELOID_LEUKEMIA | 57 | 0.56 | 2.43 |
| KEGG_NEUROACTIVE_LIGAND_RECEPTOR_INTERACTION | 259 | -0.37 | -1.81 |
| KEGG_COLORECTAL_CANCER | 62 | 0.51 | 2.23 |
| KEGG_BLADDER_CANCER | 41 | 0.59 | 2.39 |
| KEGG_MAPK_SIGNALING_PATHWAY | 261 | 0.32 | 1.79 |
| KEGG_PRIMARY_IMMUNODEFICIENCY | 34 | 0.61 | 2.36 |
| KEGG_NON_SMALL_CELL_LUNG_CANCER | 54 | 0.52 | 2.25 |
| KEGG_N_GLYCAN_BIOSYNTHESIS | 46 | 0.54 | 2.25 |
| KEGG_FC_EPSILON_RI_SIGNALING_PATHWAY | 78 | 0.44 | 2.02 |
| KEGG_CELL_CYCLE | 123 | 0.38 | 1.87 |
| KEGG_TYPE_I_DIABETES_MELLITUS | 39 | 0.57 | 2.29 |
| KEGG_ECM_RECEPTOR_INTERACTION | 84 | 0.42 | 1.96 |
| KEGG_EPITHELIAL_CELL_SIGNALING_IN_HELICOBACTER_PYLORI_INFECTION | 67 | 0.46 | 2.04 |
| KEGG_TGF_BETA_SIGNALING_PATHWAY | 83 | 0.41 | 1.87 |
| KEGG_OTHER_GLYCAN_DEGRADATION | 15 | 0.73 | 2.20 |
| KEGG_GLIOMA | 63 | 0.44 | 1.95 |
| KEGG_ADHERENS_JUNCTION | 68 | 0.44 | 1.97 |
| KEGG_INSULIN_SIGNALING_PATHWAY | 134 | 0.34 | 1.72 |
| KEGG_ENDOMETRIAL_CANCER | 52 | 0.45 | 1.91 |
| KEGG_GLUTATHIONE_METABOLISM | 48 | 0.47 | 1.96 |
| KEGG_PRION_DISEASES | 34 | 0.51 | 1.97 |
| KEGG_GLYCOSAMINOGLYCAN_BIOSYNTHESIS_CHONDROITIN_SULFATE | 22 | 0.58 | 1.98 |
| KEGG_VIBRIO_CHOLERAE_INFECTION | 51 | 0.43 | 1.85 |
| KEGG_GAP_JUNCTION | 87 | 0.36 | 1.67 |
| KEGG_ALZHEIMERS_DISEASE | 136 | 0.31 | 1.55 |
| KEGG_VEGF_SIGNALING_PATHWAY | 73 | 0.37 | 1.65 |
| KEGG_RIG_I_LIKE_RECEPTOR_SIGNALING_PATHWAY | 66 | 0.39 | 1.73 |
| KEGG_MELANOMA | 71 | 0.38 | 1.70 |
| KEGG_GLYCOSAMINOGLYCAN_BIOSYNTHESIS_KERATAN_SULFATE | 15 | 0.63 | 1.92 |
| KEGG_ABC_TRANSPORTERS | 43 | -0.47 | -1.70 |
| KEGG_PENTOSE_PHOSPHATE_PATHWAY | 27 | 0.50 | 1.80 |
| KEGG_THYROID_CANCER | 29 | 0.49 | 1.78 |
| KEGG_PROTEIN_EXPORT | 22 | 0.54 | 1.82 |
| KEGG_SNARE_INTERACTIONS_IN_VESICULAR_TRANSPORT | 37 | 0.43 | 1.71 |
| KEGG_GALACTOSE_METABOLISM | 25 | 0.50 | 1.78 |
| KEGG_SPHINGOLIPID_METABOLISM | 35 | 0.45 | 1.76 |
| KEGG_GLYCOSAMINOGLYCAN_BIOSYNTHESIS_HEPARAN_SULFATE | 25 | -0.53 | -1.71 |
| KEGG_ENDOCYTOSIS | 174 | 0.27 | 1.45 |
| KEGG_UBIQUITIN_MEDIATED_PROTEOLYSIS | 128 | 0.29 | 1.47 |
| KEGG_ERBB_SIGNALING_PATHWAY | 86 | 0.31 | 1.45 |
| KEGG_WNT_SIGNALING_PATHWAY | 147 | 0.28 | 1.44 |
| KEGG_LINOLEIC_ACID_METABOLISM | 26 | -0.51 | -1.68 |
| KEGG_AMYOTROPHIC_LATERAL_SCLEROSIS_ALS | 51 | 0.37 | 1.58 |
| KEGG_CARDIAC_MUSCLE_CONTRACTION | 71 | -0.37 | -1.49 |
| KEGG_MTOR_SIGNALING_PATHWAY | 51 | 0.36 | 1.55 |
| KEGG_CYTOSOLIC_DNA_SENSING_PATHWAY | 52 | 0.37 | 1.57 |
| KEGG_NOTCH_SIGNALING_PATHWAY | 46 | 0.37 | 1.55 |
| KEGG_GLYCOSPHINGOLIPID_BIOSYNTHESIS_GLOBO_SERIES | 14 | 0.56 | 1.68 |
| KEGG_HYPERTROPHIC_CARDIOMYOPATHY_HCM | 83 | 0.30 | 1.39 |
| KEGG_SULFUR_METABOLISM | 11 | 0.60 | 1.66 |
| KEGG_STEROID_BIOSYNTHESIS | 17 | 0.50 | 1.57 |
| KEGG_GLYCOSAMINOGLYCAN_DEGRADATION | 21 | 0.45 | 1.51 |
| KEGG_ARRHYTHMOGENIC_RIGHT_VENTRICULAR_CARDIOMYOPATHY_ARVC | 74 | 0.29 | 1.30 |
| KEGG_OLFACTORY_TRANSDUCTION | 321 | -0.26 | -1.29 |
| KEGG_GLYCOLYSIS_GLUCONEOGENESIS | 61 | 0.32 | 1.40 |
| KEGG_CALCIUM_SIGNALING_PATHWAY | 170 | -0.29 | -1.34 |
| KEGG_AXON_GUIDANCE | 124 | 0.26 | 1.30 |
| KEGG_NITROGEN_METABOLISM | 23 | -0.46 | -1.47 |

**Supplementary Table 2** Enrichment results of ACAN

| Description | setSize | enrichmentScore | NES |
| --- | --- | --- | --- |
| KEGG_RIBOSOME | 87 | 0.62 | 2.77 |
| KEGG_SYSTEMIC_LUPUS_ERYTHEMATOSUS | 117 | 0.49 | 2.33 |
| KEGG_PARKINSONS_DISEASE | 113 | -0.49 | -2.27 |
| KEGG_OXIDATIVE_PHOSPHORYLATION | 116 | -0.48 | -2.22 |
| KEGG_ALZHEIMERS_DISEASE | 157 | -0.42 | -2.06 |
| KEGG_HUNTINGTONS_DISEASE | 170 | -0.36 | -1.80 |
| KEGG_CELL_ADHESION_MOLECULES_CAMS | 131 | 0.37 | 1.79 |
| KEGG_CARDIAC_MUSCLE_CONTRACTION | 73 | -0.45 | -1.89 |
| KEGG_CITRATE_CYCLE_TCA_CYCLE | 29 | -0.58 | -2.05 |
| KEGG_ANTIGEN_PROCESSING_AND_PRESENTATION | 74 | 0.41 | 1.79 |
| KEGG_PROTEASOME | 44 | -0.50 | -1.94 |
| KEGG_DNA_REPLICATION | 36 | 0.50 | 1.85 |
| KEGG_COMPLEMENT_AND_COAGULATION_CASCADES | 68 | 0.40 | 1.70 |
| KEGG_HYPERTROPHIC_CARDIOMYOPATHY_HCM | 83 | -0.38 | -1.65 |
| KEGG_HOMOLOGOUS_RECOMBINATION | 28 | 0.53 | 1.86 |
| KEGG_CALCIUM_SIGNALING_PATHWAY | 177 | -0.31 | -1.53 |
| KEGG_CIRCADIAN_RHYTHM_MAMMAL | 12 | -0.68 | -1.83 |
| KEGG_N_GLYCAN_BIOSYNTHESIS | 46 | 0.42 | 1.63 |
| KEGG_INSULIN_SIGNALING_PATHWAY | 137 | -0.31 | -1.48 |
| KEGG_LEISHMANIA_INFECTION | 68 | 0.36 | 1.54 |
| KEGG_DILATED_CARDIOMYOPATHY | 90 | -0.34 | -1.51 |
| KEGG_AXON_GUIDANCE | 129 | -0.31 | -1.46 |
| KEGG_ABC_TRANSPORTERS | 44 | -0.40 | -1.58 |
| KEGG_TERPENOID_BACKBONE_BIOSYNTHESIS | 15 | -0.55 | -1.62 |
| KEGG_OTHER_GLYCAN_DEGRADATION | 14 | 0.56 | 1.66 |
| KEGG_GAP_JUNCTION | 90 | -0.32 | -1.43 |
| KEGG_PORPHYRIN_AND_CHLOROPHYLL_METABOLISM | 32 | 0.41 | 1.50 |
| KEGG_PATHOGENIC_ESCHERICHIA_COLI_INFECTION | 56 | -0.36 | -1.46 |
| KEGG_LONG_TERM_POTENTIATION | 70 | -0.35 | -1.45 |
| KEGG_REGULATION_OF_AUTOPHAGY | 30 | -0.41 | -1.47 |

**Supplementary Table 3** Enrichment results of PLVAP

| Description | setSize | enrichmentScore | NES |
| --- | --- | --- | --- |
| KEGG_RIBOSOME | 87 | 0.74 | 3.25 |
| KEGG_AMINOACYL_TRNA_BIOSYNTHESIS | 41 | 0.65 | 2.47 |
| KEGG_AXON_GUIDANCE | 129 | -0.44 | -2.03 |
| KEGG_NEUROACTIVE_LIGAND_RECEPTOR_INTERACTION | 262 | -0.34 | -1.75 |
| KEGG_PORPHYRIN_AND_CHLOROPHYLL_METABOLISM | 32 | 0.61 | 2.20 |
| KEGG_CALCIUM_SIGNALING_PATHWAY | 177 | -0.37 | -1.82 |
| KEGG_SYSTEMIC_LUPUS_ERYTHEMATOSUS | 117 | 0.41 | 1.92 |
| KEGG_N_GLYCAN_BIOSYNTHESIS | 46 | 0.53 | 2.03 |
| KEGG_ANTIGEN_PROCESSING_AND_PRESENTATION | 74 | 0.43 | 1.83 |
| KEGG_GAP_JUNCTION | 90 | -0.41 | -1.82 |
| KEGG_HYPERTROPHIC_CARDIOMYOPATHY_HCM | 83 | -0.39 | -1.68 |
| KEGG_RNA_POLYMERASE | 28 | 0.53 | 1.85 |
| KEGG_DNA_REPLICATION | 36 | 0.51 | 1.89 |
| KEGG_DILATED_CARDIOMYOPATHY | 90 | -0.38 | -1.68 |
| KEGG_LONG_TERM_POTENTIATION | 70 | -0.40 | -1.65 |
| KEGG_ERBB_SIGNALING_PATHWAY | 87 | -0.37 | -1.60 |
| KEGG_GLUTATHIONE_METABOLISM | 47 | 0.42 | 1.63 |
| KEGG_PHOSPHATIDYLINOSITOL_SIGNALING_SYSTEM | 76 | -0.38 | -1.59 |
| KEGG_WNT_SIGNALING_PATHWAY | 150 | -0.31 | -1.45 |
| KEGG_MAPK_SIGNALING_PATHWAY | 265 | -0.27 | -1.37 |
| KEGG_TASTE_TRANSDUCTION | 50 | -0.41 | -1.58 |
| KEGG_HEDGEHOG_SIGNALING_PATHWAY | 56 | -0.38 | -1.51 |
| KEGG_PYRIMIDINE_METABOLISM | 96 | 0.33 | 1.48 |
| KEGG_AMINO_SUGAR_AND_NUCLEOTIDE_SUGAR_METABOLISM | 44 | 0.42 | 1.59 |
| KEGG_PROTEIN_EXPORT | 23 | 0.50 | 1.67 |
| KEGG_ARRHYTHMOGENIC_RIGHT_VENTRICULAR_CARDIOMYOPATHY_ARVC | 74 | -0.35 | -1.44 |
| KEGG_GLYCOLYSIS_GLUCONEOGENESIS | 61 | 0.35 | 1.46 |
| KEGG_ASCORBATE_AND_ALDARATE_METABOLISM | 17 | 0.55 | 1.68 |
| KEGG_HOMOLOGOUS_RECOMBINATION | 28 | 0.44 | 1.54 |
| KEGG_GLYCOSAMINOGLYCAN_DEGRADATION | 21 | 0.47 | 1.52 |
| KEGG_T_CELL_RECEPTOR_SIGNALING_PATHWAY | 105 | -0.31 | -1.39 |
| KEGG_SPLICEOSOME | 126 | 0.28 | 1.31 |
| KEGG_PENTOSE_AND_GLUCURONATE_INTERCONVERSIONS | 20 | 0.49 | 1.58 |
| KEGG_PARKINSONS_DISEASE | 113 | -0.31 | -1.40 |
| KEGG_LONG_TERM_DEPRESSION | 70 | -0.35 | -1.41 |
| KEGG_RENAL_CELL_CARCINOMA | 70 | -0.34 | -1.40 |
| KEGG_ADHERENS_JUNCTION | 73 | -0.33 | -1.37 |
| KEGG_VALINE_LEUCINE_AND_ISOLEUCINE_BIOSYNTHESIS | 10 | 0.60 | 1.53 |
| KEGG_TIGHT_JUNCTION | 130 | -0.29 | -1.33 |
| KEGG_CIRCADIAN_RHYTHM_MAMMAL | 12 | -0.59 | -1.57 |

**Supplementary Table 4** Enrichment results of HBEGF

| Description | setSize | enrichmentScore | NES |
| --- | --- | --- | --- |
| KEGG_RIBOSOME | 87 | 0.56 | 2.40 |
| KEGG_SPLICEOSOME | 126 | 0.43 | 1.96 |
| KEGG_P53_SIGNALING_PATHWAY | 67 | 0.51 | 2.08 |
| KEGG_CYTOKINE_CYTOKINE_RECEPTOR_INTERACTION | 243 | 0.32 | 1.62 |
| KEGG_CIRCADIAN_RHYTHM_MAMMAL | 12 | 0.76 | 2.05 |
| KEGG_GLYCOSAMINOGLYCAN_BIOSYNTHESIS_HEPARAN_SULFATE | 26 | -0.59 | -2.09 |
| KEGG_PROTEIN_EXPORT | 23 | 0.60 | 1.96 |
| KEGG_ADHERENS_JUNCTION | 73 | 0.43 | 1.79 |
| KEGG_PATHOGENIC_ESCHERICHIA_COLI_INFECTION | 56 | 0.45 | 1.75 |
| KEGG_MAPK_SIGNALING_PATHWAY | 265 | 0.29 | 1.47 |
| KEGG_BLADDER_CANCER | 42 | 0.47 | 1.74 |
| KEGG_GLYCEROPHOSPHOLIPID_METABOLISM | 77 | -0.37 | -1.64 |
| KEGG_SYSTEMIC_LUPUS_ERYTHEMATOSUS | 117 | -0.32 | -1.53 |
| KEGG_HYPERTROPHIC_CARDIOMYOPATHY_HCM | 83 | 0.37 | 1.58 |
| KEGG_ANTIGEN_PROCESSING_AND_PRESENTATION | 74 | -0.35 | -1.55 |
| KEGG_N_GLYCAN_BIOSYNTHESIS | 46 | -0.41 | -1.63 |
| KEGG_LYSINE_DEGRADATION | 44 | -0.42 | -1.68 |
| KEGG_RENAL_CELL_CARCINOMA | 70 | 0.37 | 1.53 |
| KEGG_VIBRIO_CHOLERAE_INFECTION | 54 | 0.38 | 1.47 |
| KEGG_GLYCEROLIPID_METABOLISM | 48 | -0.37 | -1.51 |
| KEGG_ETHER_LIPID_METABOLISM | 33 | -0.41 | -1.54 |
| KEGG_THYROID_CANCER | 29 | 0.45 | 1.53 |
| KEGG_PROXIMAL_TUBULE_BICARBONATE_RECLAMATION | 23 | 0.47 | 1.52 |
| KEGG_FC_EPSILON_RI_SIGNALING_PATHWAY | 77 | -0.31 | -1.38 |
| KEGG_CELL_CYCLE | 124 | 0.30 | 1.34 |
| KEGG_INSULIN_SIGNALING_PATHWAY | 137 | 0.28 | 1.31 |
| KEGG_ARRHYTHMOGENIC_RIGHT_VENTRICULAR_CARDIOMYOPATHY_ARVC | 74 | 0.34 | 1.40 |
| KEGG_STEROID_BIOSYNTHESIS | 17 | -0.51 | -1.56 |

**Supplementary Table 5** Candidate drugs targeted by the pivotal genes.

|  | Gene | Drug | Interaction score |
| --- | --- | --- | --- |
| FDA approved drugs | CD44 | HYALURONIC ACID | 0.92 |
| CD44 | MOMETASONE | 0.61 |
| CD44 | ODEVIXIBAT | 0.46 |
| CD44 | GENTAMICIN | 0.24 |
| HBEGF | ALECTINIB | 0.16 |
| HBEGF | BRIGATINIB | 0.15 |
| HBEGF | LORLATINIB | 0.13 |
| HBEGF | REPOTRECTINIB | 0.12 |
| CD44 | ACETAMINOPHEN | 0.11 |
| HBEGF | CERITINIB | 0.10 |
| HBEGF | GILTERITINIB | 0.09 |
| HBEGF | PANITUMUMAB | 0.08 |
| HBEGF | CRIZOTINIB | 0.07 |
| HBEGF | CETUXIMAB | 0.04 |
| CD44 | DOCETAXEL ANHYDROUS | 0.03 |
| CD44 | CISPLATIN | 0.02 |
| FDA unapproved drugs | HBEGF | KHK-2866 | 3.26 |
| CD44 | SC-435 | 2.75 |
| CD44 | PF-03475952 | 2.75 |
| CD44 | BIVATUZUMAB | 2.75 |
| HBEGF | COMPOUND 17 | 1.63 |
| HBEGF | NELADALKIB | 1.63 |
| HBEGF | UNECRITINIB | 1.63 |
| HBEGF | ANTI-HBEGF MONOCLONAL ANTIBODY U3-1565 | 1.63 |
| HBEGF | ZOTIZALKIB | 1.63 |
| HBEGF | FICONALKIB | 1.63 |
| HBEGF | TL13-112 | 1.63 |
| HBEGF | ENVONALKIB | 1.63 |
| CD44 | ELOBIXIBAT | 1.37 |
| CD44 | [3H]TAUROCHOLIC ACID | 1.37 |
| CD44 | 264W94 | 1.37 |
| CD44 | MARALIXIBAT | 0.92 |
| HBEGF | CEP-37440 | 0.82 |
| HBEGF | COMPOUND 5G | 0.82 |
| HBEGF | ENSARTINIB | 0.82 |
| HBEGF | COMPOUND 5M | 0.82 |
| CD44 | GAMMA-INTERFERON | 0.61 |
| CD44 | MPA | 0.55 |
| HBEGF | COMPOUND 5N | 0.54 |
| HBEGF | COMPOUND 15 | 0.54 |
| CD44 | GP-120 ANTIGEN | 0.42 |
| HBEGF | IRUPLINALKIB | 0.41 |
| CD44 | RECOMBINANT TUMOR NECROSIS FACTOR FAMILY PROTEIN | 0.37 |
| HBEGF | AZD3463 | 0.33 |
| HBEGF | GSK-1838705A | 0.33 |
| HBEGF | COMPOUND 8E | 0.23 |
| HBEGF | COMPOUND 25B | 0.20 |
| CD44 | BIVATUZUMAB MERTANSINE | 0.17 |
| HBEGF | BELIZATINIB | 0.16 |
| HBEGF | ANTISERUM | 0.09 |
| HBEGF | NVP-TAE684 | 0.02 |
